# Supplementary material for: Arabidopsis noncoding RNA mediates control of photomorphogenesis by red light
Source: HighWire-hosted journal article supplement (doi:10.1073/pnas.1409457111), 2014-06-30
Supplement: pnas.201409457SI.pdf [file pnas.201409457SI.pdf]

# Supporting Information

Wang et al. 10.1073/pnas.1409457111

## SI Materials and Methods

**Plant Materials and Growth Conditions.** The ecotype of all wild-type *Arabidopsis thaliana* used in this study was Columbia-0 (Col-0). The *phyB-9*, *cry1-304*, *pif3-3*, and *hid1* mutants (salk\_017318) were reported previously (1–4). *phyA211* was ordered from the Arabidopsis Biological Resource Center. *Arabidopsis* seed sterilization, stratification, and standard seedling growth experiments were performed according to methods previously outlined (5). Different wavelength-specific conditions were as follows unless otherwise stated: 5  $\mu\text{mol}\cdot\text{m}^{-2}\cdot\text{s}^{-1}$  for far red light, 60  $\mu\text{mol}\cdot\text{m}^{-2}\cdot\text{s}^{-1}$  for red light, and 7  $\mu\text{mol}\cdot\text{m}^{-2}\cdot\text{s}^{-1}$  for blue light.

**Northern Blot Analysis.** Northern blot analysis was performed as previously reported (6). The sequences used for probing ncRNAs in this study are listed in Table S1.

**Chlorophyll Content Measurement.** Chlorophyll content was measured as previously described (7). The 50-mg seedlings were thoroughly homogenized in liquid nitrogen. Then 1 mL 80% (vol/vol) acetone was added to extract the chlorophyll. ODs at 645 nm and 663 nm were measured with a DU800 spectrophotometer (Beckman). Data are shown as the mean  $\pm$  SD ( $n = 4$ ).

**Measurement of the Cotyledon Opening Angle.** The cotyledon opening angle was defined as the angle between two cotyledon petioles (8). At least 30 seedlings grown on Murashige and Skoog plates were examined for each biological replicate. Measurements were made using Leica microsystem software. Data are shown as the mean  $\pm$  SD ( $n \geq 30$ ).

**Plasmid Construction and Generation of Transgenic Plants.** To generate 35S:A and 35S:B constructs, DNA fragments containing full-length *nc3020–nc3017* coding sequences and full-length *nc3019–nc3017* coding sequences with attB sites were amplified from Col-0 genomic DNA and then were cloned into the gateway vector pDONR221 vector (Invitrogen) using BP Clonase. Each insert then was transferred into the Gateway pB2GW7 vector by LR reaction (Invitrogen).

To generate full-length (*pHID1:HID1*), mutated (*pHID1:M1* and *pHID1:M2*), and motif-deleted (*pHID1:dSLs*) *HID1* constructs, the fragment containing 1.5 kb upstream of *AtHID1* and the full-length *HID1* coding sequence plus the 101-bp downstream sequence was amplified from Col-0 genomic DNA and then was cloned into BamHI/PstI sites of pCambia1300. *pHID1:M1* (ATG to ATA in SL3), *pHID1:M2* (ATG to AG in SL3), *pHID1:dSL1* (deletion of SL1), *pHID1:dSL2* (deletion of SL2), *pHID1:dSL3* (deletion of SL3), and *pHID1:dSL4* (deletion of SL4) mutants were generated by PCR-based mutagenesis using a *pHID1:HID1* plasmid as the template and then were cloned into pCambia1300 (Cambia).

For the *pOsHID1:OsHID1* construct, the KpnI/HindIII sites containing 1.5 kb upstream of *OsHID1* and the full-length *OsHID1* coding sequence plus the 200-bp downstream sequence were amplified from *Oryza sativa* Japonica cv. Nipponbare genomic DNA and then were cloned into the binary vector pCambia1300 (Cambia).

For the *pHID1:S1-HID1* construct, the minimal S1 aptamer sequence (9) was inserted into the middle of the *HID1* SL3 motif as a possible RNA affinity tag. The modified fragment, which included 1.5 kb upstream of *HID1* and the *S1-HID1* plus the 100-bp downstream sequence, was cloned into the BamHI/PstI sites of pCambia1300.

*Agrobacterium tumefaciens* strain GV3101 was used to transform *A. thaliana* plants of the indicated backgrounds using the floral dip method. All transgenic plants were obtained through the use of antibiotic selection and were verified by Northern blot analysis.

To generate *pPIF3:LUC* (WT-p) and *pPIF3mut:LUC* (dI-p) reporter constructs, 1,574 bp upstream of the translation start site of *PIF3* (WT-p) and the same subfragment without the first intron sequence (dI-p) were cloned into the SalI/BamHI sites of reporter vector pGreen-0800-LUC (10). Both plasmids were transformed into *Agrobacterium tumefaciens* strain GV3101, which also contained the helper plasmid pSoup-P19. All the cloning primers are listed in Table S1.

**Quantitative RT-PCR and RNA-Seq.** Total RNA was isolated using RNeasy Plant Mini Kits (Qiagen). For quantitative RT-PCR (qRT-PCR), 3  $\mu\text{g}$  of total RNA was used to synthesize cDNA with SSRII transcriptase (Invitrogen). Real-time PCR was performed using SYBR Premix Ex Taq Kits (Takara) on a 7500 Fast Real-Time PCR Amplifier (Applied Biosystems). The mRNA level of *ACTIN7* (*ACT7*) was used as our internal control.

Total RNA from 5-d-old WT and *hid1* seedlings grown in continuous red light (cR) was isolated using RNeasy Plant Mini Kits (Qiagen). Three biological replicates for each sample were subjected to RNA-seq. Poly (A) RNA from 1  $\mu\text{g}$  total RNA was used to generate the cDNA library according to the TruSeq RNA Sample Prep Kit protocol. The library then was sequenced using a HiSeq 2000 system (Illumina). RNA-seq reads were mapped to TAIR10 using Tophat (version 2.0.9) (11). Differentially expressed genes were defined as those that differed by more than twofold with an adjusted  $P$  value  $\leq 0.05$  that was identified using Cuffdiff software (version 2.0.0) (12). We uploaded all the raw data to the Gene Expression Omnibus database under accession number GSE57806.

**mRNA Decay Assay.** For actinomycin D treatment, the time course started with untreated 5-d-old cR-grown seedlings. These seedlings then were incubated in half-strength Murashige and Skoog liquid medium (Sigma-Aldrich) with DMSO (mock) or 200  $\mu\text{M}$  actinomycin D (Sigma-Aldrich) for the indicated period before being subjected to qRT-PCR.

**Protein Extraction and Western Blot Analysis.** Total protein extraction for detecting PIF3 was performed as previously described (13). Western blot analyses were performed as previously reported (5). Polyclonal anti-PIF3 antibodies were used at a 1:300 dilution. CSN6 was used as a loading control (14).

**Biochemical Fractionation Assay.** Nuclear cytoplasmic fractionation was carried out according to a previously reported protocol with some modifications (15). In brief, 0.5-g seedlings were ground into powder in liquid nitrogen and then were homogenized in 10 mL of Extraction Buffer 1 consisting of 0.4 M sucrose, 10 mM Tris-HCl (pH 8.0), 10 mM  $\text{MgCl}_2$ , 5 mM  $\beta$ -mercaptoethanol ( $\beta$ -ME), 1 mM phenylmethylsulfonyl fluoride (PMSF), and 1 $\times$  complete protease inhibitor mixture (PI). The brei then was filtered through two layers of Miracloth (EMD Millipore) before being centrifuged at 3,000  $\times g$  for 20 min at 4  $^\circ\text{C}$ . Cytoplasmic RNA was isolated from 1 mL of supernatant using a TRIzol reagent. After being washed extensively with precooled Extraction Buffer 2 consisting of 0.25 M sucrose, 10 mM Tris-HCl (pH 8.0), 10 mM  $\text{MgCl}_2$ , 1% Triton X-100, 5 mM  $\beta$ -ME, 1 mM PMSF, and 1 $\times$  PI, the pellet was resuspended in 250  $\mu\text{L}$  of

precooled Extraction Buffer 3 consisting of 1.7 M sucrose, 10 mM Tris-HCl (pH 8.0), 2 mM MgCl<sub>2</sub>, 0.15% Triton X-100, 5 mM β-ME, 1 mM PMSF, and 1× PI, which then was gently added on top of 300 μL Extraction Buffer 3. After centrifugation at 16,000 × g for 30 min at 4 °C, RNA was extracted from the pellet immediately using a TRIzol reagent. Then 1/10th of the isolated RNA was used as the nuclear RNA component for Northern blot analysis.

Isolation of chromatin-bound fractions was performed as previously described (16). RNA was extracted immediately from all fractions using a TRIzol reagent. Unless otherwise stated, 8 U/mL RNase inhibitor (Fermentas) were used in all buffers.

**Gel Filtration Chromatography.** Gel filtration analysis was performed as previously described, with some modifications (5). Five-day-old cR-grown seedlings were homogenized in a lysis buffer consisting of 50 mM Tris-HCl (pH 7.5), 450 mM NaCl, 1 mM EDTA, 10% (vol/vol) glycerol, 0.1% Tween 20, 1 mM PMSF, 1× PI, and 100 U/mL RNase inhibitor. After centrifugation at 16,000 × g for 15 min at 4 °C, the supernatant was filtered through a 0.22-μm syringe filter and was fractionated using a Superose 6 column (Amersham Biosciences). After the void volume (8 mL) was achieved, consecutive fractions of 0.5 mL were collected. RNA in each fraction was extracted using a TRIzol reagent and subsequently was analyzed by Northern blot.

**RNA Immunoprecipitation Assay.** Five-day-old cR-grown *pHID1: S1-HID1/hid1* and *hid1* seedlings were homogenized in a lysis buffer consisting of 50 mM Tris-HCl (pH 7.5), 150 mM NaCl, 1 mM EDTA, 10% (vol/vol) glycerol, 0.1% Tween 20, 1 mM PMSF, 1× PI, and 100 U/mL RNase inhibitor on ice for 10 min. After centrifugation at 16,000 × g for 15 min at 4 °C, the supernatant was collected, and its protein concentration was measured by the Bradford assay (Bio-Rad) at 595 nm on a DU800 spectrophotometer (Beckman). RNA extracted from 25 mg of total seedlings using a TRIzol reagent was used as the input sample. Prewashed streptavidin Sepharose beads (GE Healthcare) were mixed with 600 μg total protein extract in a total volume of 500 μL and then were rotated at 4 °C for 3 h. After extensive washing, the RNAs eluted from the beads using a TRIzol reagent were used as the immunoprecipitation (IP)

sample. Input and IP samples were mixed with 2× RNA loading dye (Fermentas) and subjected to Northern blot analysis.

**ChIP Assay.** ChIP was performed based on previously reported protocols with some modifications (15, 17). A half gram of 5-d-old cR-grown *pHID1: S1-HID1/hid1* and *hid1* seedlings was cross-linked in 15 mL 1% fresh formaldehyde solution under vacuum twice for 10 min. To quench crosslinking, 2 M glycine was added to a final concentration of 0.125 M and was applied under vacuum for another 5 min. To protect RNA from degradation, RNase inhibitor was added. After a 1-h preclear step with pre-washed protein G beads, streptavidin beads and protein G beads were used to precipitate the IP and control samples, respectively, and were rotated at 4 °C for 3 h. The subsequent steps were performed according to the methodology outlined in ref. 15.

**Transient Transcription Dual-Luciferase Assay.** A previously reported Dual-Luciferase (Dual-LUC) assay in *Arabidopsis* (18) was modified for our analysis. Agrobacteria containing WT-p and dI-p plasmids were collected and diluted to 0.5 OD<sub>600</sub> in a resuspension buffer [10 mM MgCl<sub>2</sub>, 10 mM Mes-KOH (pH 5.7), 200 μM acetosyringone]. After incubation at room temperature for 2 h, the Agrobacterial suspension was infiltrated gently into rosette leaves of ~20-d-old long-day-grown (16 h light/8 h dark) WT and *hid1* mutant plants using a 5-mL syringe. Plants were maintained under light of the indicated wavelength for 3 d after infiltration. Infiltrated leaves were collected and used for the Dual-LUC assay, which was performed using the Dual-Luciferase Reporter Assay Kit (Promega) as previously reported (18). At least three biological repeats were measured for each sample.

**Accession Numbers.** Accession numbers obtained from the Arabidopsis Information Resource (TAIR) for the genes mentioned in this article are as follows: *PHYB*, AT2G18790; *CRY1*, AT4G08920; *PIF3*, AT1G09530; *PIF1*, AT2G20180; *PIF4*, AT2G43010; *PIF5*, AT3G59060; *PIF7*, AT5G61270; *ACT7*, AT5G09810; *CSN6*, AT5G56280; *SNRK2.5*, AT5G63650; *XTR7*, AT4G14130; *LHCB2.3*, AT3G27690; *PHYA*, AT1G09570; *RUP1*, AT5G52250; *SPT*, AT4G36930; *LHCB4.3*, AT2G40100; *ELIP2*, AT4G14690; *CPI*, AT4G36880.

1. Reed JW, Nagpal P, Poole DS, Furuya M, Chory J (1993) Mutations in the gene for the red/far-red light receptor phytochrome B alter cell elongation and physiological responses throughout *Arabidopsis* development. *Plant Cell* 5(2):147–157.
2. Mockler TC, Guo H, Yang H, Duong H, Lin C (1999) Antagonistic actions of *Arabidopsis* cryptochromes and phytochrome B in the regulation of floral induction. *Development* 126(10):2073–2082.
3. Monte E, et al. (2004) The phytochrome-interacting transcription factor, PIF3, acts early, selectively, and positively in light-induced chloroplast development. *Proc Natl Acad Sci USA* 101(46):16091–16098.
4. Wang Y, et al. (2014) Genomic features and regulatory roles of intermediate-sized non-coding RNAs in *Arabidopsis*. *Mol Plant* 7(3):514–527.
5. Zhu D, et al. (2008) Biochemical characterization of *Arabidopsis* complexes containing CONSTITUTIVELY PHOTOMORPHOGENIC1 and SUPPRESSOR OF PHYA proteins in light control of plant development. *Plant Cell* 20(9):2307–2323.
6. Liu TT, et al. (2013) A global identification and analysis of small nucleolar RNAs and possible intermediate-sized non-coding RNAs in *Oryza sativa*. *Mol Plant* 6(3):830–846.
7. Arnon DI (1949) Copper enzymes in isolated chloroplasts. polyphenoloxidase in *Beta Vulgaris*. *Plant Physiol* 24(1):1–15.
8. Brenner ED, et al. (2000) *Arabidopsis* mutants resistant to S(+)-beta-methyl-alpha, beta-diaminopropionic acid, a cycad-derived glutamate receptor agonist. *Plant Physiol* 124(4):1615–1624.
9. Srisawat C, Engelke DR (2001) Streptavidin aptamers: Affinity tags for the study of RNAs and ribonucleoproteins. *RNA* 7(4):632–641.
10. Hellens RP, et al. (2005) Transient expression vectors for functional genomics, quantification of promoter activity and RNA silencing in plants. *Plant Methods* 1:13.
11. Trapnell C, Pachter L, Salzberg SL (2009) TopHat: Discovering splice junctions with RNA-Seq. *Bioinformatics* 25(9):1105–1111.
12. Trapnell C, et al. (2010) Transcript assembly and quantification by RNA-Seq reveals unannotated transcripts and isoform switching during cell differentiation. *Nat Biotechnol* 28(5):511–515.
13. Park E, et al. (2004) Degradation of phytochrome interacting factor 3 in phytochrome-mediated light signaling. *Plant Cell Physiol* 45(8):968–975.
14. Peng Z, Serino G, Deng XW (2001) Molecular characterization of subunit 6 of the COP9 signalosome and its role in multifaceted developmental processes in *Arabidopsis*. *Plant Cell* 13(11):2393–2407.
15. Gendrel AV, Lippman Z, Martienssen R, Colot V (2005) Profiling histone modification patterns in plants using genomic tiling microarrays. *Nat Methods* 2(3):213–218.
16. Cernilogar FM, et al. (2011) Chromatin-associated RNA interference components contribute to transcriptional regulation in *Drosophila*. *Nature* 480(7377):391–395.
17. Schmitz KM, Mayer C, Postepska A, Grummt I (2010) Interaction of noncoding RNA with the rDNA promoter mediates recruitment of DNMT3b and silencing of rRNA genes. *Genes Dev* 24(20):2264–2269.
18. Liu H, et al. (2008) Photoexcited CRY2 interacts with CIB1 to regulate transcription and floral initiation in *Arabidopsis*. *Science* 322(5907):1535–1539.

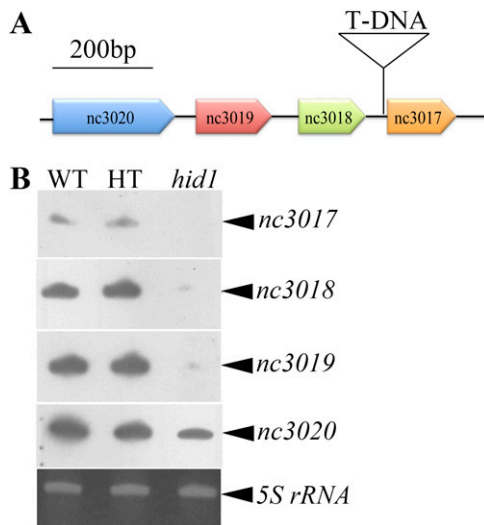

**Fig. S1.** Characterization of a T-DNA insertion mutant, *hid1*. (A) Schematic illustration of *Agrobacterium* transferred DNA (T-DNA) insertion in a noncoding RNA gene cluster. (B) Northern blot analysis of *nc3017*, *nc3018*, *nc3019*, and *nc3020* in 5-d-old seedlings grown in cR. *5S rRNA* is used as the loading control. HT, heterozygous seedlings.

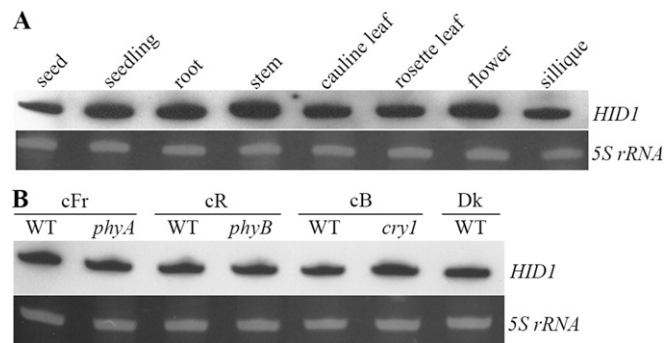

**Fig. S2.** *HID1* is expressed ubiquitously in different organs and various light conditions. Northern blot analyses show the expression of *HID1* in different organs (A) and various light conditions (B) as indicated. *5S rRNA* is used as the loading control.

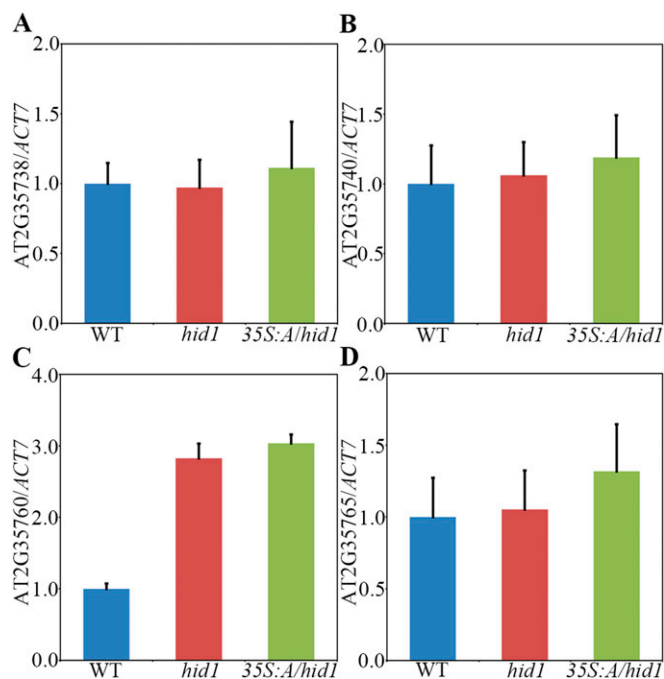

**Fig. S3.** The expression levels of neighboring genes are not affected by *HID1*. qRT-PCR analysis showing the expressions of AT2G35738 (A), AT2G35740 (B), AT2G35760 (C), and AT2G35765 (D) in 5-d-old WT, *hid1*, and *35S:A/hid1* seedlings grown in cR. cB, continuous blue light; cFr, continuous far-red light.

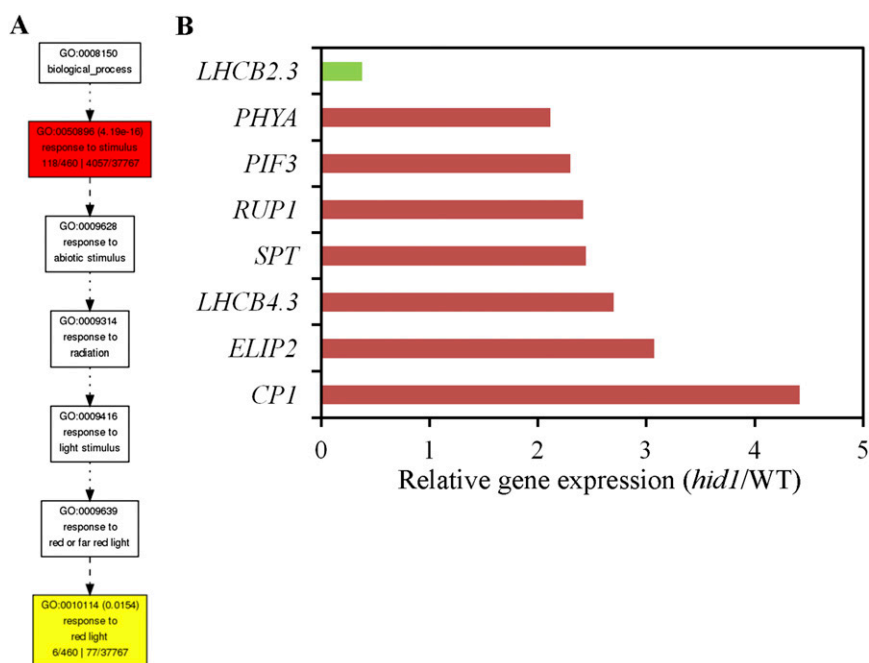

**Fig. S4.** A branch of red light-responsive genes exhibit significant expression changes in 5-d-old *hid1* seedlings grown in cR compared with WT control. (A) Gene Ontology classification using the agriGO web tool (<http://bioinfo.cau.edu.cn/agriGO/>) showing that a small set of genes that respond to red light are enriched in 5-d-old WT and *hid1* seedlings grown in cR. (B) Relative expression of genes responsive to red light in *hid1* compared with WT seedlings grown in cR light for 4 d ( $Q$  value < 0.05).

**Table S1. Primers and probes used in this study**

| Name             | Cloning primers                                          |
|------------------|----------------------------------------------------------|
| 35S:A-F          | GGGGACAAGTTTGTACAAAAAAGCAGGCTAATCGACTGAACACACACAC        |
| 35S:A-R          | GGGGACCACTTTGTACAAGAAAGCTGGGTAGAAACGTCTCAAGCGGCT         |
| 35S:B-F          | GGGGACAAGTTTGTACAAAAAAGCAGGCTAAATGCCATGGACGTTGAT         |
| 35S:B-R          | GGGGACCACTTTGTACAAGAAAGCTGGGTAGAAACGTCTCAAGCGGCT         |
| pHID1:HID1-F     | ACTGGATCCATGGATTGGGGAGATACATAGATCAA                      |
| pHID1:HID1-R     | ACTCTGCAGCAATGTTAATCAGTCCCGAAAGATG                       |
| pHID1:M1-F       | GGGCATACCCATAGACGTTGATGGAGCTCTAGGG                       |
| pHID1:M1-R       | GTCTATGGGTATGCCAATTGCTTTGTGAC                            |
| pHID1:M2-F       | CATGCCCAGGACGTTGATGGAGCTCTAGG                            |
| pHID1:M2-R       | CAACGTCCTGGGCATGCCAATTGC                                 |
| pOsHID1:OsHID1-F | AATGGTACCCTGAAGTGGGCTATGATTTATCCTC                       |
| pOsHID1:OsHID1-R | AATAAGCTTCCTGGGATATGGGATATAATACAGAATG                    |
| HID1-dSL1-F      | GTGACGAGCTATTACTAAAAAGATGGAGCAATCTGA                     |
| HID1-dSL1-R      | AGTAATAGCTCGTCACGTAACCTAATCCCTAACTTG                     |
| HID1-dSL2-F      | GAATCTATAACGTCACAAAGCAATTGGG                             |
| HID1-dSL2-R      | GTGACGTTATAGATTCCTTGGAGAGAAATCTCGT                       |
| HID1-dSL3-F      | GTCACAAATATTGGCTCTCATATTCCATTGCC                         |
| HID1-dSL3-R      | AGCCAATATTTGTGACGTTTACTAGTGGATTATGC                      |
| HID1-dSL4-F      | TTGCTATTATATCCATTGCCTTGC                                 |
| HID1-dSL4-R      | GGGAATATAATAGCAAGATACCCAAAACGGAGA                        |
| S1-HID1-F        | CGGGCCGGGGCTT                                            |
| S1-HID1-R        | CTGGTCGGAGCTCCATCAAC                                     |
| S1-HID1-S        | ATGGAGCTCCGACCAGAATCATGCAAGTGC                           |
| S1-HID1-AS       | GAGAAGCCCCGGCCCGACTATCTTACGCACTTGCATGATTCTGGTCGGAGCTCCAT |
| pPIF3-LUC-F      | AATGTCGACTATAGTAGGATCACTTCCATTCCGAG                      |
| pPIF3-LUC-R      | AATGGATCCGGTGTTCGCTTTTACAGAAACAAT                        |
| pPIF3mut-LUC-R   | AATGGATCCCTCAAAGTATTAAGTGGCATCAATCC                      |
| <b>Name</b>      | <b>Genotyping primers</b>                                |
| hid1-LP          | CCGTGATGTTAAAGGCGGTGT                                    |
| hid1-RP          | GGAAACGTCTCAAGCGGCTAG                                    |
| LBb1.3           | ATTTTGCCGATTTCCGGAAC                                     |
| pif3-3-F         | AATTGTAATAATGCGAAGGACCTG                                 |
| pif3-3-R         | TAGTCCTGAGAAAGTAGGCGGAG                                  |
| <b>Name</b>      | <b>qRT-PCR primers</b>                                   |
| ACT7-RT-F        | GTATGCTCTTCCTCATGCTATCCTT                                |
| ACT7-RT-R        | TTCCCGTTCTGCGGTAGTG                                      |
| PIF1-RT-F        | GTGGTGAATCTGGACCGTTGC                                    |
| PIF1-RT-R        | AACTGTCAGTACCATCCGTC                                     |
| PIF3-RT-F        | CAAAGACGACTATGGTGGACGAG                                  |
| PIF3-RT-R        | ACGAAGAAGCAGCAGGAGCTGAT                                  |
| PIF4-RT-F        | GGTAACGACCGTTGGACCTAGC                                   |
| PIF4-RT-R        | ACCAGAGGAGCCACCTGATGAG                                   |
| PIF5-RT-F        | AGATGGCTATGCAAAGTCAGATGC                                 |
| PIF5-RT-R        | TGTGCTTGGAGCTGCAACTGTAC                                  |
| PIF7-RT-F        | CGGAGCTTGAAGACAGCTAGAACC                                 |
| PIF7-RT-R        | GACTCGTTGTGAATCGCTGCTG                                   |
| SNRK2.5-RT-F     | CGCAGGAGTGCAGACACCTTC                                    |
| SNRK2.5-RT-R     | CCGCTTGAGCAGGCTCTGTAA                                    |
| XTR7-RT-F        | GGCACCGTCACTGCTTACTACG                                   |
| XTR7-RT-R        | CCCTTGAGCAAAGACATTGGTG                                   |
| AT4G35720-RT-F   | TCCGAGACTCCACAAAGCGTA                                    |
| AT4G35720-RT-R   | CCCAAAGCTCTAACCTTGGAGA                                   |
| AT2G35738-RT-F   | CATGGCTATCGAAACTGATTCTGC                                 |
| AT2G35738-RT-R   | GCACAGTAGAGCAGTGGAACTTGA                                 |
| AT2G35740-RT-F   | TATCACAGAGGTGTGGACGACG                                   |
| AT2G35740-RT-R   | GACTCCCCTGTTGTATCCGAAG                                   |
| AT2G35760-RT-F   | TATTCTTTGGTTCAGGCGGTTT                                   |
| AT2G35760-RT-R   | CGCCACACACAAGTATGCTACTG                                  |
| AT2G35765-RT-F   | CCATCGGACAGAGGATAGACTCAG                                 |
| AT2G35765-RT-R   | ATGGAGATCAAACCTTGATTGGCTG                                |

**Table S1. Cont.**

| <b>Name</b>                   | <b>Northern Blot probes</b>                                  |
|-------------------------------|--------------------------------------------------------------|
| <i>HID1</i> ( <i>nc3020</i> ) | TCATGGCCGGTCCCAAACGGTAAAAGCAGCGACGCCGCTCCGCAAGGCAATGGAA      |
| <i>nc3019</i>                 | GCCTCAGAATTGCAGAAGTATCATCAATGTTAATCAGTCCCGAAAGATGGTGTCTTTT   |
| <i>nc3018</i>                 | TGGGTTAGAGATGGTTATCAGCACTAATATCAGAGTGGTGCATGACATTCTCGTTCATC  |
| <i>nc3017</i>                 | AACCATCAGCAACCAAAAGTTATCATCAAAGAAAATACAGTCCGCATCAAGGTCAAGTCA |
| <i>OsHID1</i>                 | GGGAATATTCGCCTCATGGCCAATCCCAAATTTTCAAGGCAGCAACGCCGCTACA      |
| <i>tRNA0119</i>               | CGAACCGCTCACAGAAGGATTTACAGTCTGCACTCTACCAGAGCTACTACCTGTTACC   |
| <i>dSL4</i>                   | ATGCCCAATTGCTTTGTGACGTTTACTAGTGGATTATGCAATCACAATTTTCAG       |
| <b>Name</b>                   | <b>ChIP-qPCR primers</b>                                     |
| <i>pPIF3</i> -ChIP-F1         | TAATGATTCGGGCGACGCTAA                                        |
| <i>pPIF3</i> -ChIP-R1         | GGGGACCAAATCGTCTGTAAGT                                       |
| <i>pPIF3</i> -ChIP-F2         | TTGTGCGTCGATTTGTCTCCA                                        |
| <i>pPIF3</i> -ChIP-R2         | AGTGGCATCAATCCAAATGCAG                                       |
| <i>pPIF3</i> -ChIP-F3         | TGACTTCGATTGCTTCAAGTACCC                                     |
| <i>pPIF3</i> -ChIP-R3         | AATGGCAACATGATTAGTCAAATCA                                    |
| <i>pPIF3</i> -ChIP-F4         | TTGCATATTGATGATTGAGACATTGA                                   |
| <i>pPIF3</i> -ChIP-R4         | CGAAGTCTTGATCCTAAAAAGGTGA                                    |
| <i>pPIF3</i> -ChIP-F5         | TGTAAAACGCAACACCATGCC                                        |
| <i>pPIF3</i> -ChIP-R5         | ATGGGACTCACGGAGAAGGG                                         |
| <i>ACT7</i> -ChIP-F           | GAGGCACCTCTTAACCCTAAAGC                                      |
| <i>ACT7</i> -ChIP-R           | GAGACACACCATCACCAGAATCG                                      |
